# Supplementary material for: Differential Proinflammatory and Oxidative Stress Response and Vulnerability to Metabolic Syndrome in Habitual High-Fat Young Male Consumers Putatively Predisposed by Their Genetic Background
Source: PubMed Central journal article supplement (PMC3794726; doi:10.3390/ijms140917238), 2013-08-22
Supplement: ijms-14-17238-s001.pdf [file ijms-14-17238-s001.pdf]

## Supplementary Information

**Table S1.** Upregulated transcripts in SCAAT of obese vs. lean subjects classified according to GO biological process criteria.

| GO biological process              | Gene symbol         | Gene name                                                | SLR  |      | Reference sequence |
|------------------------------------|---------------------|----------------------------------------------------------|------|------|--------------------|
|                                    |                     |                                                          | Mean | SD   |                    |
| Cell cycle                         | <i>EGFL6</i>        | EGF-like-domain, multiple 6                              | 3.13 | 0.79 | NM_015507          |
| Cell growth and cell proliferation | <i>LTBP2</i>        | Latent transforming growth factor beta binding protein 2 | 0.62 | 0.30 | NM_000428          |
|                                    | <i>PALLD</i>        | Palladin, cytoskeletal associated protein                | 1.10 | 0.22 | NM_016081          |
|                                    | <i>TAGLN</i>        | Transgelin                                               | 0.90 | 0.35 | NM_003186          |
|                                    | <i>ACP5</i>         | Acid phosphatase 5, tartrate resistant                   | 1.58 | 0.53 | NM_001611          |
|                                    | <i>GPNMB</i>        | Glycoprotein (transmembrane) nmb                         | 0.53 | 0.17 | NM_002510          |
| Immune and inflammation response   | <i>CHI3L1/YKL40</i> | Chitinase 3-like 1 or human cartilage glycoprotein-39    | 1.28 | 0.53 | NM_001276          |
|                                    | <i>SPP1</i>         | Secreted phosphoprotein 1                                | 1.78 | 0.43 | NM_000582          |
|                                    | <i>CTGF</i>         | Connective tissue growth factor                          | 1.25 | 0.19 | NM_001901          |
|                                    | <i>TPSAB1</i>       | Tryptase alpha/beta 1                                    | 0.95 | 0.06 | NM_003294          |
| Chemokine receptor activity        | <i>DARC</i>         | Duffy blood group, chemokine receptor                    | 0.80 | 0.16 | NM_002036          |
|                                    | <i>ALCAM</i>        | Activated leukocyte cell adhesion molecule               | 0.73 | 0.33 | NM_001627          |
|                                    | <i>C1S</i>          | Complement component 1, s subcomponent                   | 0.58 | 0.25 | NM_001734          |
|                                    | <i>MIF</i>          | Macrophage migration inhibitory factor                   | 0.58 | 0.10 | NM_002415          |
|                                    | <i>HLA-DQA1</i>     | Major histocompatibility complex, class II, DQ alpha 1   | 0.90 | 0.79 | NM_002122          |
|                                    | <i>DEFA1</i>        | Defensin, alpha 1, myeloid-related sequence              | 1.25 | 0.71 | NM_004084          |
|                                    | <i>SAA2</i>         | Serum amyloid A2                                         | 0.93 | 0.91 | NM_030754          |
|                                    | <i>HLA-DRB4</i>     | Major histocompatibility complex, class II, DR beta 4    | 4.05 | 0.51 | NM_021983          |
|                                    | <i>SPON2</i>        | Spondin 2, extracellular matrix protein                  | 0.75 | 0.19 | NM_012445          |
|                                    | <i>TUBB2</i>        | Tubulin, beta 2                                          | 0.75 | 0.17 | NM_001069          |
|                                    | <i>ITGB5</i>        | Integrin, beta 5                                         | 0.68 | 0.37 | NM_002213          |
|                                    | <i>TNMD</i>         | Tenomodulin                                              | 1.53 | 0.56 | NM_022144          |
|                                    | <i>IGLC1</i>        | immunoglobulin lambda constant 1                         | 0.68 | 0.66 | X57812             |
| Proteolysis and peptidolysis       | <i>CD59</i>         | CD59 molecule, complement regulatory protein             | 0.40 | 0.24 | NM_000611          |
|                                    | <i>CTSB</i>         | Cathepsin B                                              | 0.65 | 0.45 | NM_001908          |
|                                    | <i>MMP9</i>         | Matrix metalloproteinase 9                               | 1.30 | 0.67 | NM_004994          |

Table S1. Cont.

| GO biological process | Gene symbol   | Gene name                                                                     | SLR  |      | Reference sequence |
|-----------------------|---------------|-------------------------------------------------------------------------------|------|------|--------------------|
|                       |               |                                                                               | Mean | SD   |                    |
| Signal transduction   | <i>EIF5A</i>  | Eukaryotic translation initiation factor 5A                                   | 1.70 | 0.98 | NM_001970          |
|                       | <i>WISP2</i>  | WNT1 inducible signaling pathway protein 2                                    | 1.55 | 0.37 | NM_003881          |
|                       | <i>CNKSR2</i> | Connector enhancer of kinase suppressor of Ras 2                              | 1.38 | 0.38 | NM_014927          |
|                       | <i>CRYAB</i>  | Crystallin, alpha B                                                           | 0.78 | 0.74 | NM_001885          |
|                       | <i>MEN1</i>   | Multiple endocrine neoplasia I                                                | 0.53 | 0.86 | NM_000244          |
| Stress response       | <i>NQO1</i>   | NAD(P)H dehydrogenase, quinone 1                                              | 1.30 | 0.41 | NM_000903          |
|                       | <i>UCHL1</i>  | Ubiquitin carboxyl-terminal esterase L1                                       | 1.10 | 0.58 | NM_004181          |
|                       | <i>HSPB7</i>  | Heat shock 27 kda protein family, member 7                                    | 0.78 | 0.46 | NM_014424          |
| Transport             | <i>SLC5A3</i> | Solute carrier family 5, member 3                                             | 0.53 | 0.38 | NM_006933          |
|                       | <i>MAP1B</i>  | Microtubule-associated protein 1B                                             | 0.78 | 0.43 | NM_005909          |
|                       | <i>SVEP1</i>  | Sushi, von Willebrand factor type A,<br>EGF and pentraxin domain containing 1 | 3    | 1.87 | NM_153366.3        |

SLR: Signal Log Ratio; SD: Standard Deviation.

**Table S2.** Downregulated transcripts in SCAAT of obese vs. lean subjects classified according to GO biological process criteria.

| GO biological process              | Gene symbol                                                    | Gene name                                                 | SLR   |           | Reference sequence |
|------------------------------------|----------------------------------------------------------------|-----------------------------------------------------------|-------|-----------|--------------------|
|                                    |                                                                |                                                           | Mean  | SD        |                    |
| Cell cycle                         | <i>FOSB</i>                                                    | FBJ murine osteosarcoma viral oncogene homolog B          | -3.38 | 0.26      | NM_006732          |
|                                    | <i>CDKN2C</i>                                                  | Cyclin-dependent kinase inhibitor 2C (p18, inhibits CDK4) | -1.20 | 0.47      | NM_001262          |
|                                    | <i>CIDEA</i>                                                   | Cell death-inducing DFFA-like effector a                  | -1.13 | 0.38      | NM_001279          |
|                                    | <i>DUSP6</i>                                                   | Dual specificity phosphatase 6                            | -1.00 | 0.77      | NM_001946          |
|                                    | <i>ARMCX2</i>                                                  | Armadillo repeat containing, X linked 2                   | -0.93 | 0.31      | NM_014782          |
|                                    | <i>PLAGL1</i>                                                  | Pleiomorphic adenoma gene-like 1                          | -0.65 | 0.17      | NM_002656          |
|                                    | <i>CCNG2</i>                                                   | Cyclin G2                                                 | -0.65 | 0.26      | NM_004354          |
|                                    | <i>RAD21</i>                                                   | RAD21 homolog (S. Pombe)                                  | -0.53 | 0.17      | NM_006265          |
| Cell growth and cell proliferation | <i>CYR61</i>                                                   | Cysteine-rich, angiogenic inducer, 61                     | -1.68 | 0.38      | NM_001554          |
|                                    | <i>S100B</i>                                                   | S100 calcium binding protein, Beta                        | -0.90 | 0.50      | NM_006272          |
|                                    | <i>LRIG1</i>                                                   | Leucine-rich repeats and immunoglobulin-like domains 1    | -0.88 | 0.22      | NM_015541          |
| Immune and inflammation response   | <i>CA3</i>                                                     | Carbonic anhydrase III, muscle specific                   | -2.05 | 0.77      | NM_005181          |
|                                    | <i>ZFP36</i>                                                   | Zinc finger protein 36, C3H type, homolog (mouse)         | -0.93 | 0.75      | NM_003407          |
|                                    | <i>MUT</i>                                                     | Methylmalonyl Coenzyme A mutase                           | -0.80 | 0.73      | NM_000255          |
|                                    | <i>CAPN7</i>                                                   | Calpain 7                                                 | -0.70 | 0.24      | NM_014296          |
|                                    | <i>IER2</i>                                                    | Immediate early response 2                                | -0.63 | 0.15      | NM_004907          |
|                                    | <i>NID1</i>                                                    | Nidogen 1                                                 | -0.60 | 0.55      | NM_002508          |
|                                    | <i>CXCL14</i>                                                  | Chemokine (C-X-C motif) ligand 14                         | -0.60 | 0.35      | NM_004887          |
|                                    | <i>CD302</i>                                                   | CD302 molecule                                            | -0.53 | 0.13      | NM_014880          |
|                                    | <i>DDIT4</i>                                                   | DNA-damage inducible transcript 4                         | -0.53 | 0.26      | NM_019058          |
|                                    | <i>NID2</i>                                                    | Nidogen 2 (osteonidogen)                                  | -0.53 | 0.49      | NM_007361          |
|                                    | <i>RGCC</i>                                                    | Regulator of cell cycle                                   | -0.50 | 0.49      | NM_014059          |
|                                    | <i>TCRA/TCRD</i>                                               | T cell receptor alpha delta locus                         | -0.50 | 0.39      | NG_001332.2        |
|                                    | <i>PTENP1</i>                                                  | Phosphatase and tensin homolog pseudogene 1               | -0.45 | 0.34      | NG_001337.2        |
| <i>SATI</i>                        | Spermidine/spermine N1-acetyltransferase, transcript variant 1 | -0.55                                                     | 0.10  | NM_002970 |                    |

Table S2. Cont.

| GO biological process | Gene symbol    | Gene name                                                   | SLR   |      | Reference sequence |
|-----------------------|----------------|-------------------------------------------------------------|-------|------|--------------------|
|                       |                |                                                             | Mean  | SD   |                    |
|                       | <i>FOS</i>     | v-FOS FBJ murine osteosarcoma viral oncogene                | -2.75 | 2.10 | NM_005252          |
|                       | <i>EGR1</i>    | Early growth response 1                                     | -1.58 | 0.28 | NM_001964          |
|                       | <i>DDX3X</i>   | DEAD (Asp-Glu-Ala-Asp) box polypeptide 3, X-linked          | -0.33 | 0.17 | NM_001356          |
|                       | <i>CLMN</i>    | Calmin (calponin-like, transmembrane                        | -1.18 | 0.44 | NM_024734          |
|                       | <i>CITED2</i>  | Cbp/p300-interacting transactivator                         | -1.05 | 0.26 | NM_006079          |
|                       | <i>HLF</i>     | Hepatic leukemia factor                                     | -0.98 | 0.49 | NM_002126          |
|                       | <i>GNAI1</i>   | Guanine nucleotide binding protein (G protein)              | -0.95 | 0.31 | NM_002069          |
|                       | <i>NR3C1</i>   | Nuclear receptor subfamily 3, group C, member 1             | -0.90 | 0.18 | NM_000176          |
|                       | <i>SVIL</i>    | Supervillin                                                 | -0.90 | 0.45 | NM_003174          |
|                       | <i>TJP2</i>    | Tight junction protein 2 (zona occludens 2)                 | -0.88 | 0.28 | NM_004817          |
|                       | <i>TWIST1</i>  | Twist homolog                                               | -0.88 | 0.28 | NM_000474          |
|                       | <i>KLF4</i>    | Kruppel-like factor 4 (gut)                                 | -0.83 | 0.31 | NM_004235          |
|                       | <i>NR1P1</i>   | Nuclear receptor interacting protein 1                      | -0.80 | 0.44 | NM_003489          |
| Signal transduction   | <i>ATF2</i>    | Activating transcription factor 2                           | -0.75 | 0.26 | NM_001880          |
|                       | <i>SPRY1</i>   | Sprouty homolog 1, antagonist of FGF signaling (Drosophila) | -0.70 | 0.29 | NM_005841          |
|                       | <i>RHOB</i>    | Ras homolog gene family, member B                           | -0.68 | 0.19 | NM_004040          |
|                       | <i>ANK2</i>    | Ankyrin 2                                                   | -0.68 | 0.22 | NM_001148          |
|                       | <i>CXCR7</i>   | Chemokine (C-X-C motif) receptor 7                          | -0.68 | 0.57 | NM_020311          |
|                       | <i>JUN</i>     | Jun proto-oncogene                                          | -0.68 | 0.31 | NM_002228          |
|                       | <i>GLUL</i>    | Glutamate-ammonia ligase (glutamine synthetase)             | -0.68 | 0.05 | NM_002065          |
|                       | <i>EIF3K</i>   | Eukaryotic translation initiation factor 3, subunit K       | -0.48 | 0.10 | NM_013234          |
|                       | <i>EIF3L</i>   | Eukaryotic translation initiation factor 3, subunit L       | -0.48 | 0.10 | NM_016091          |
|                       | <i>NR1D1</i>   | Nuclear receptor subfamily 1, group D, member 1             | -0.48 | 0.38 | NM_021724          |
|                       | <i>TIMP4</i>   | Metallopeptidase inhibitor 4                                | -0.48 | 0.45 | NM_003256          |
|                       | <i>RAPGEF2</i> | Rap guanine nucleotide exchange factor (GEF) 2              | -0.38 | 0.10 | NM_014247          |
|                       | <i>MYOD1</i>   | Myogenic differentiation 1                                  | -0.30 | 0.16 | NM_002478          |
|                       | <i>AGTR1</i>   | Angiotensin II receptor, type 1                             | -0.10 | 0.39 | NM_000685          |

Table S2. Cont.

| GO biological process | Gene symbol     | Gene name                                                 | SLR   |      | Reference sequence |
|-----------------------|-----------------|-----------------------------------------------------------|-------|------|--------------------|
|                       |                 |                                                           | Mean  | SD   |                    |
| Stress response       | <i>GHR</i>      | Growth hormone receptor                                   | -0.73 | 0.33 | NM_000163          |
|                       | <i>VEGFA</i>    | Vascular endothelial growth factor A                      | -1.53 | 0.58 | NM_003376          |
|                       | <i>NDRG4</i>    | NDRG family member 4                                      | -1.50 | 0.64 | NM_020465          |
|                       | <i>NET1</i>     | Neuroepithelial cell transforming gene 1                  | -0.88 | 0.22 | NM_005863          |
|                       | <i>IGF1</i>     | Insulin-like growth factor 1 (somatomedin C)              | -0.98 | 0.13 | NM_000618          |
|                       | <i>DPYD</i>     | Dihydropyrimidine dehydrogenase                           | -0.35 | 0.29 | NM_000110          |
|                       | <i>DUSP1</i>    | Dual specificity phosphatase 1                            | -0.85 | 0.79 | NM_004417          |
|                       | <i>TCF7L2</i>   | Transcription factor 7-like 2 (T-cell specific, HMG-box)  | -0.30 | 0.24 | NM_030756          |
|                       | <i>HMGB2</i>    | High-mobility group box 2                                 | -0.28 | 0.17 | NM_002129          |
| Transport             | <i>SLC39A14</i> | carrier family 39 (zinc transporter), member 14           | -0.35 | 0.29 | NM_001128431       |
|                       | <i>SLC19A2</i>  | Solute carrier family 19 (thiamine transporter), member 2 | -0.93 | 0.13 | NM_006996          |

SLR: Signal Log Ratio; SD: Standard Deviation.
